# Supplementary material for: Associations of Depression, Anxiety, Worry, Perceived Stress, and Loneliness Prior to Infection With Risk of Post–COVID-19 Conditions
Source: PubMed Central journal article supplement (PMC9453634; doi:10.1001/jamapsychiatry.2022.2640), 2022-09-07
Supplement: jamapsychiatry-e222640-s001.pdf [file jamapsychiatry-e222640-s001.pdf]

## Supplemental Online Content

Wang S, Quan L, Chavarro JE, et al. Associations of depression, anxiety, worry, perceived stress, and loneliness prior to infection with risk of post-COVID-19 conditions. *JAMA Psychiatry*. Published online September 7, 2022.  
doi:10.1001/jamapsychiatry.2022.2640

**eFigure 1.** Questionnaire sequence for the COVID-19 study, April 2020 to November 2021

**eFigure 2.** Flow chart of study design and study population selection, April 2020 to November 2021

### eMethods

**eTable 1.** Health and demographic characteristics at baseline (April-September 2020) by missing long COVID status, among participants who ever tested positive for SARS-CoV-2 between April 2020 - November 2021, N=3,752

**eTable 2.** Spearman correlations between types of distress among persons with a positive SARS-CoV-2 test from April 2020 to November 2021, NHS II, NHS3, and GUTS, N=3,193

**eTable 3.** Prevalence of long-COVID-related symptoms among participants with long COVID, N=1,403

**eTable 4.** Long COVID status ascertained on monthly or quarterly versus final questionnaire among 3,193 participants infected with SARS-COV-2

**eTable 5.** Prevalence of COVID-19 related symptoms reported on monthly or quarterly follow up and the final questionnaire among persons who had eligible measures on both questionnaires, N=1,381

**eTable 6.** Agreement between COVID-19 related symptoms reported on monthly or quarterly versus final questionnaires, among participants data on both types of questionnaires, N=1,381

**eTable 7.** Sensitivity analysis for the association of types of distress and subsequent risk of long COVID among persons with a positive SARS-CoV-2 test during follow-up, April 2020 - November 2021

**eTable 8.** Association of types of distress and risk of subsequent long COVID (more than 8 weeks) among persons with a positive SARS-CoV-2 test during follow-up, April 2020 - November 2021, N=3,142

This supplemental material has been provided by the authors to give readers additional information about their work.

eFigure 1. Questionnaire sequence for the COVID-19 study, April 2020 to November 2021

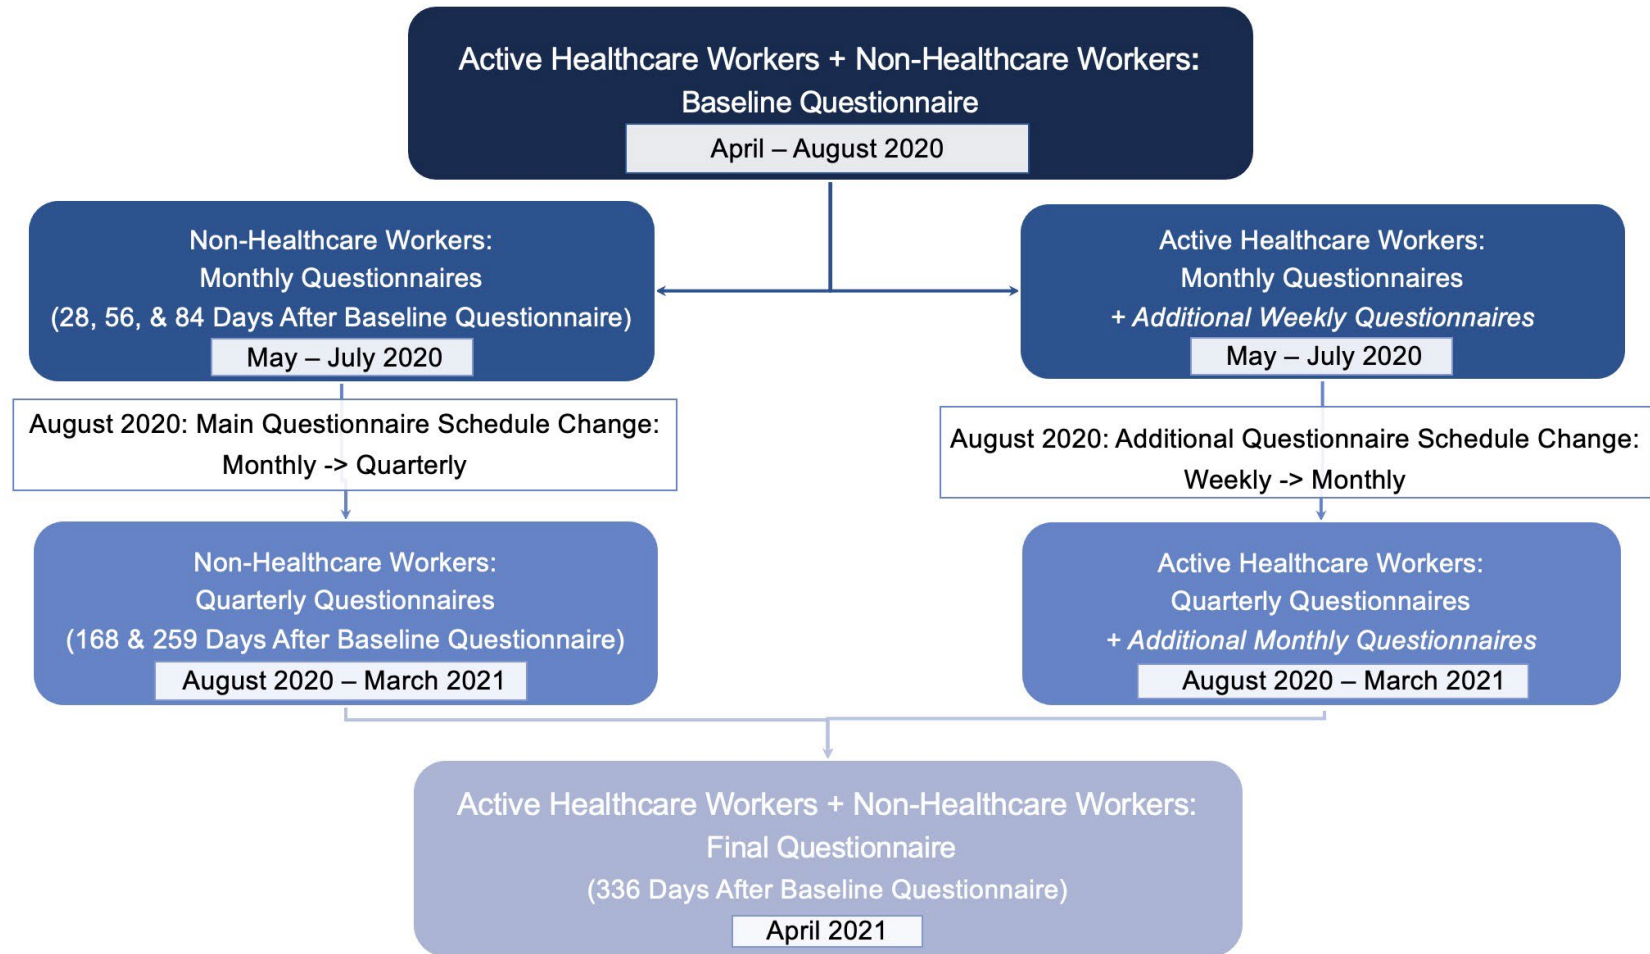

**eFigure 2. Flow chart of study design and study population selection, April 2020 to November 2021**

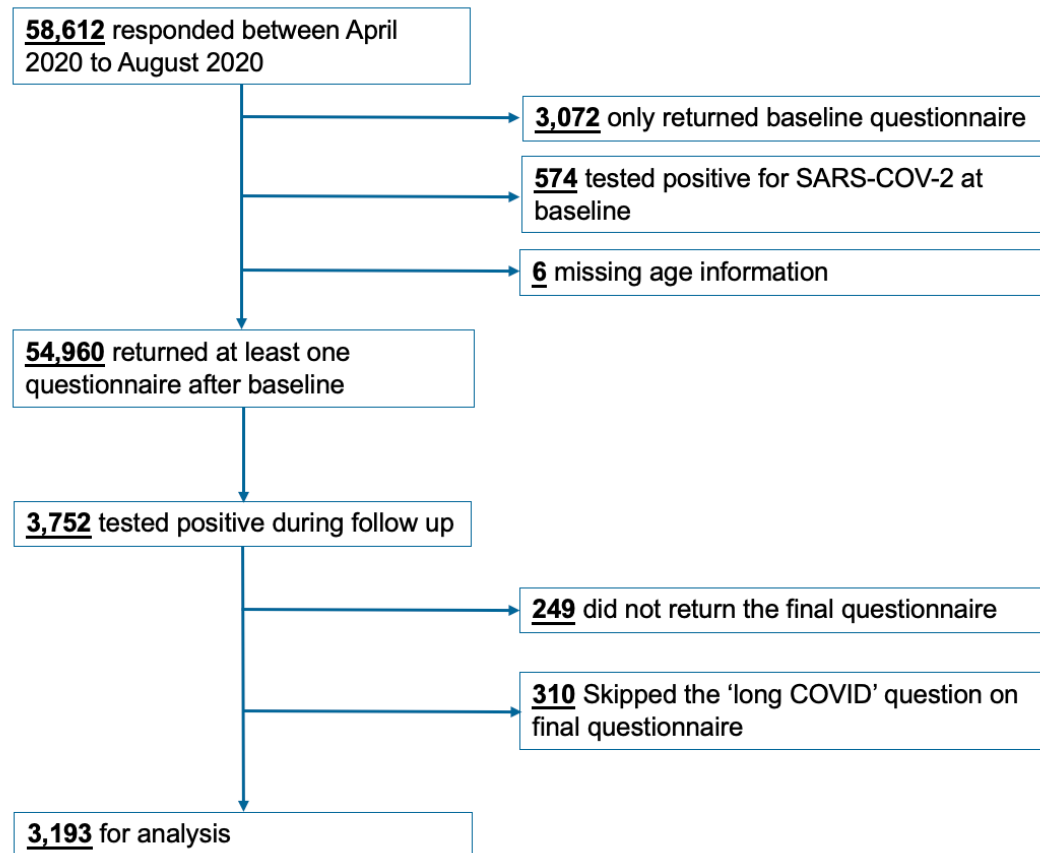

## eMethods

Nine COVID-19-related symptoms were queried on each follow-up questionnaire, for each of three timeframes: past-7, -30, and -90 days. Participants were asked, “during the past [7/30/90] days, have you experienced any of the following symptoms: persistent cough, shortness of breath, fever, sore throat, muscle aches, digestive symptoms (vomiting, diarrhea), loss of taste, loss of smell, or other symptoms consistent with COVID-19 infection?” We identified participants who reported COVID-19 symptoms lasting  $\geq 30$  days, using the reported date of positive test as the beginning of symptoms, and conservatively calculating the date of last symptoms as: return date of the last questionnaire on which any symptom was reported - the timeframe (e.g., 7, 30, or 90 days). In a sensitivity analysis, we considered as cases only participants reporting long COVID both in follow-up questionnaires and in the final questionnaire.

**eTable 1. Health and demographic characteristics at baseline (April-September 2020) by missing long COVID status, among participants who ever tested positive for SARS-CoV-2 between April 2020 - November 2021, N=3,752.**

|                                       | No. (%)                     |                                                                                      |                                               |                                                  |
|---------------------------------------|-----------------------------|--------------------------------------------------------------------------------------|-----------------------------------------------|--------------------------------------------------|
|                                       | Missing 'long COVID' status |                                                                                      |                                               |                                                  |
|                                       | Not missing<br>N=3193       | Missing                                                                              |                                               |                                                  |
|                                       |                             | Did not return final questionnaire or left blank on the final questionnaire<br>N=559 | Did not return final questionnaire<br>(N=249) | Left blank on the final questionnaire<br>(N=310) |
| Age, mean (SD), years                 | 55.3 (13.8)                 | 52.6 (14.2)                                                                          | 50.6 (14.8)                                   | 54.3 (13.4)                                      |
| Race                                  |                             |                                                                                      |                                               |                                                  |
| White                                 | 3091 (96.8)                 | 538 (96.2)                                                                           | 245 (98.4)                                    | 293 (94.5)                                       |
| Sex                                   |                             |                                                                                      |                                               |                                                  |
| Female                                | 3078 (96.4)                 | 536 (95.9)                                                                           | 232 (93.2)                                    | 304 (98.1)                                       |
| Active healthcare worker, yes         | 1565 (49.0)                 | 368 (65.8)                                                                           | 144 (57.8)                                    | 224 (72.3)                                       |
| Married, yes                          | 2231 (69.9)                 | 335 (59.9)                                                                           | 150 (60.2)                                    | 185 (59.7)                                       |
| Partner's education <sup>a</sup>      |                             |                                                                                      |                                               |                                                  |
| High school or lower                  | 388 (12.2)                  | 45 (8.1)                                                                             | 22 (8.8)                                      | 23 (7.4)                                         |
| BMI, kg/m <sup>2</sup>                |                             |                                                                                      |                                               |                                                  |
| 25 to <30                             | 958 (30.0)                  | 154 (27.6)                                                                           | 65 (26.1)                                     | 89 (28.7)                                        |
| 30 to <35                             | 591 (18.5)                  | 90 (16.1)                                                                            | 45 (18.1)                                     | 45 (14.5)                                        |
| ≥35                                   | 488 (15.3)                  | 63 (11.3)                                                                            | 34 (13.7)                                     | 29 (9.4)                                         |
| Smoking status                        |                             |                                                                                      |                                               |                                                  |
| Current smoker                        | 93 (2.9)                    | 25 (4.5)                                                                             | 13 (5.2)                                      | 12 (3.9)                                         |
| Diabetes, ever                        | 166 (5.2)                   | 24 (4.3)                                                                             | 15 (6.0)                                      | 9 (2.9)                                          |
| Hypertension, ever                    | 688 (21.6)                  | 86 (15.4)                                                                            | 41 (16.5)                                     | 45 (14.5)                                        |
| High cholesterol, ever                | 835 (26.2)                  | 130 (23.3)                                                                           | 57 (22.9)                                     | 73 (23.6)                                        |
| Asthma, ever                          | 425 (13.3)                  | 81 (14.5)                                                                            | 34 (13.7)                                     | 47 (15.2)                                        |
| Cancer, ever                          | 148 (4.6)                   | 24 (4.3)                                                                             | 9 (3.6)                                       | 15 (4.8)                                         |
| Probable depression, yes              | 397 (12.5)                  | 86 (15.4)                                                                            | 39 (15.7)                                     | 47 (15.2)                                        |
| Probable anxiety, yes                 | 651 (20.4)                  | 133 (23.9)                                                                           | 53 (21.5)                                     | 80 (25.9)                                        |
| Very worried about COVID              | 496 (15.6)                  | 109 (19.5)                                                                           | 35 (14.1)                                     | 74 (23.9)                                        |
| Loneliness, some of the time or often | 456 (28.3)                  | 60 (31.9)                                                                            | 26 (25.2)                                     | 34 (40.0)                                        |
| Perceived stress, mean (SD)           | 1.3 (1.1)                   | 1.5 (1.1)                                                                            | 1.4 (1.1)                                     | 1.6 (1.1)                                        |

Note. Perceived stress and loneliness were collected only in persons who were not active health care workers.

**eTable 2. Spearman correlations between types of distress among persons with a positive SARS-CoV-2 test from April 2020 to November 2021, NHS II, NHS3, and GUTS, N=3,193.**

|                     | Depressive symptoms | Anxiety symptoms | Worry about COVID | Perceived stress | Loneliness |
|---------------------|---------------------|------------------|-------------------|------------------|------------|
| Depressive symptoms | 1.0                 | -                | -                 | -                | -          |
| Anxiety symptoms    | $\rho=0.63^a$       | 1.0              | -                 | -                | -          |
| Worry about COVID   | $\rho=0.23^a$       | $\rho=0.30^a$    | 1.0               | -                | -          |
| Perceived stress    | $\rho=0.54^a$       | $\rho=0.54^a$    | $\rho=0.22^a$     | 1.0              | -          |
| Loneliness          | $\rho=0.46^a$       | $\rho=0.32^a$    | $\rho=0.14^a$     | $\rho=0.39^a$    | 1.0        |

Note. NHS = Nurses' Health Study; GUTS = Growing Up Today Study. Perceived stress and loneliness were queried in non-active health care workers only.

<sup>a</sup> $P<.001$

**eTable 3. Prevalence of long-COVID-related symptoms among participants with long COVID, N=1,403**

| Symptoms                                    | N   | %    |
|---------------------------------------------|-----|------|
| Fatigue                                     | 786 | 56.0 |
| Smell or taste problems                     | 626 | 44.6 |
| Shortness of breath or difficulty breathing | 358 | 25.5 |
| Confusion, disorientation, 'brain fog'      | 343 | 24.5 |
| Memory issues                               | 306 | 21.8 |
| Muscle, joint or chest pain                 | 260 | 18.5 |
| Headache                                    | 254 | 18.1 |
| Heart palpitations                          | 225 | 16.0 |
| Depression, anxiety, changes in mood        | 208 | 14.8 |
| Persistent cough                            | 184 | 13.1 |
| Intermittent fever                          | 34  | 2.4  |
| Mouth or tongue ulcers                      | 34  | 2.4  |
| Rash, blisters, or welts anywhere on body   | 32  | 2.3  |

**eTable 4. Long COVID status ascertained on monthly or quarterly versus final questionnaire among 3,193 participants infected with SARS-COV-2.**

|                     |              | No. (%)                             |               |                          |
|---------------------|--------------|-------------------------------------|---------------|--------------------------|
|                     |              | Monthly or quarterly questionnaires |               |                          |
|                     |              | Yes<br>(N=950)                      | No<br>(N=431) | Undetermined<br>(N=1812) |
| Final questionnaire | Yes (N=1790) | 560 (59.0%)                         | 138 (32.0%)   | 1092 (60.3%)             |
|                     | No (N=1403)  | 390 (41.1%)                         | 293 (68.0%)   | 720 (39.7%)              |

*Note.* “Undetermined” participants were those who did not return monthly or quarterly questionnaires within a timeframe enabling ascertainment of long COVID.



**eTable 5. Prevalence of COVID-19 related symptoms reported on monthly or quarterly follow up and the final questionnaire among persons who had eligible measures on both questionnaires, N=1,381.**

|                                             | No. (%)                                                                          |                                                                |
|---------------------------------------------|----------------------------------------------------------------------------------|----------------------------------------------------------------|
|                                             | 'Past 7- 30- or 90-day symptoms" reported on monthly or quarterly questionnaires | 'When you had COVID': symptoms reported on final questionnaire |
| Symptoms, ever                              |                                                                                  |                                                                |
| Persistent cough                            | 471 (34.2)                                                                       | 530 (38.5)                                                     |
| Shortness of breath or difficulty breathing | 345 (25.0)                                                                       | 423 (30.7)                                                     |
| Fever                                       | 406 (29.5)                                                                       | 652 (47.3)                                                     |
| Sore throat                                 | 539 (39.1)                                                                       | 411 (29.8)                                                     |
| Muscle aches                                | 639 (46.4)                                                                       | 865 (62.7)                                                     |
| Digestive symptoms                          | 488 (35.4)                                                                       | 312 (22.6)                                                     |
| Loss of taste                               | 389 (28.2)                                                                       | 721 (52.3)                                                     |
| Loss of smell                               | 411 (29.8)                                                                       | 754 (54.7)                                                     |

**eTable 6. Agreement between COVID-19 related symptoms reported on monthly or quarterly versus final questionnaires, among participants with data on both types of questionnaires, N=1,381.**

|                                                                | 'Past 7- 30- or 90-day symptoms' reported on monthly or quarterly questionnaires |                     |       |             |             |                    |               |               |
|----------------------------------------------------------------|----------------------------------------------------------------------------------|---------------------|-------|-------------|-------------|--------------------|---------------|---------------|
|                                                                | Persistent cough                                                                 | Shortness of breath | Fever | Sore throat | Muscle pain | Digestive symptoms | Loss of taste | Loss of smell |
|                                                                | Agreement (Cohen's kappa)                                                        |                     |       |             |             |                    |               |               |
| 'When you had COVID': symptoms reported on final questionnaire |                                                                                  |                     |       |             |             |                    |               |               |
| Persistent cough                                               | 0.36                                                                             |                     |       |             |             |                    |               |               |
| Shortness of breath                                            |                                                                                  | 0.49                |       |             |             |                    |               |               |
| Fever                                                          |                                                                                  |                     | 0.38  |             |             |                    |               |               |
| Sore throat                                                    |                                                                                  |                     |       | 0.32        |             |                    |               |               |
| Muscle pain                                                    |                                                                                  |                     |       |             | 0.30        |                    |               |               |
| Digestive symptoms                                             |                                                                                  |                     |       |             |             | 0.30               |               |               |
| Loss of taste                                                  |                                                                                  |                     |       |             |             |                    | 0.41          |               |
| Loss of smell                                                  |                                                                                  |                     |       |             |             |                    |               | 0.42          |

**eTable 7. Sensitivity analyses for the association of types of distress and subsequent risk of long COVID among persons with a positive SARS-CoV-2 test during follow-up, April 2020 - November 2021**

|                             | Main model              | Model 1: Main model, excluding 304 long COVID cases with only psychiatric, cognitive, or neurological symptoms <sup>a</sup> | Model 2: Main model, excluding 846 participants with any COVID-19-related symptoms at baseline | Model 3: Main model, excluding 528 participants with discordant long COVID status | Model 4: Main model, restricting to 115 men |
|-----------------------------|-------------------------|-----------------------------------------------------------------------------------------------------------------------------|------------------------------------------------------------------------------------------------|-----------------------------------------------------------------------------------|---------------------------------------------|
| Probable depression (PHQ-2) |                         |                                                                                                                             |                                                                                                |                                                                                   |                                             |
| No                          | 1.0 [Reference]         | 1.0 [Reference]                                                                                                             | 1.0 [Reference]                                                                                | 1.0 [Reference]                                                                   | 1.0 [Reference]                             |
| Subclinical symptoms        | <b>1.25 (1.12-1.40)</b> | <b>1.29 (1.13-1.47)</b>                                                                                                     | <b>1.26 (1.10-1.45)</b>                                                                        | <b>1.29 (1.13-1.48)</b>                                                           | 1.94 (0.91-4.12)                            |
| Yes                         | <b>1.39 (1.19-1.63)</b> | <b>1.39 (1.15-1.66)</b>                                                                                                     | <b>1.32 (1.07-1.63)</b>                                                                        | <b>1.41 (1.16-1.71)</b>                                                           | 2.19 (0.74-6.47)                            |
| <i>P</i> trend <sup>c</sup> | <b>&lt;.001</b>         | <b>&lt;.001</b>                                                                                                             | <b>&lt;.001</b>                                                                                | <b>&lt;.001</b>                                                                   | 0.07                                        |
| Probable anxiety (GAD-2)    |                         |                                                                                                                             |                                                                                                |                                                                                   |                                             |
| No                          | 1.0 [Reference]         | 1.0 [Reference]                                                                                                             | 1.0 [Reference]                                                                                | 1.0 [Reference]                                                                   | 1.0 [Reference]                             |
| Subclinical symptoms        | <b>1.28 (1.13-1.45)</b> | <b>1.32 (1.14-1.52)</b>                                                                                                     | <b>1.29 (1.12-1.50)</b>                                                                        | <b>1.32 (1.14-1.53)</b>                                                           | <b>2.54 (1.12-5.78)</b>                     |
| Yes                         | <b>1.47 (1.27-1.70)</b> | <b>1.55 (1.31-1.82)</b>                                                                                                     | <b>1.46 (1.22-1.74)</b>                                                                        | <b>1.54 (1.30-1.83)</b>                                                           | 1.85 (0.66-5.15)                            |
| <i>P</i> trend <sup>c</sup> | <b>&lt;.001</b>         | <b>&lt;.001</b>                                                                                                             | <b>&lt;.001</b>                                                                                | <b>&lt;.001</b>                                                                   | 0.12                                        |
| Worry about COVID           |                         |                                                                                                                             |                                                                                                |                                                                                   |                                             |
| Not at all/not very worried | 1.0 [Reference]         | 1.0 [Reference]                                                                                                             | 1.0 [Reference]                                                                                | 1.0 [Reference]                                                                   | 1.0 [Reference]                             |
| Somewhat worried            | <b>1.22 (1.07-1.38)</b> | <b>1.22 (1.06-1.40)</b>                                                                                                     | <b>1.28 (1.10-1.48)</b>                                                                        | <b>1.32 (1.13-1.53)</b>                                                           | 1.92 (0.87-4.26)                            |
| Very worried                | <b>1.43 (1.22-1.68)</b> | <b>1.47 (1.23-1.76)</b>                                                                                                     | <b>1.46 (1.20-1.78)</b>                                                                        | <b>1.50 (1.24-1.82)</b>                                                           | <b>3.23 (1.07-9.79)</b>                     |
| <i>P</i> trend <sup>c</sup> | <b>&lt;.001</b>         | <b>&lt;.001</b>                                                                                                             | <b>&lt;.001</b>                                                                                | <b>&lt;.001</b>                                                                   | <b>.03</b>                                  |
| Perceived stress            |                         |                                                                                                                             |                                                                                                |                                                                                   |                                             |
| Q1, 0-2 points, (least)     | 1.0 [Reference]         | 1.0 [Reference]                                                                                                             | 1.0 [Reference]                                                                                | 1.0 [Reference]                                                                   | 1.0 [Reference]                             |
| Q2, 3-4 points              | 1.07 (0.87-1.32)        | 1.06 (0.84-1.34)                                                                                                            | 1.07 (0.85-1.36)                                                                               | 1.02 (0.79-1.31)                                                                  | 1.18 (0.40-3.46)                            |
| Q3, 5-6 points              | 1.21 (0.97-1.52)        | 1.19 (0.92-1.53)                                                                                                            | 1.16 (0.89-1.52)                                                                               | 1.22 (0.93-1.59)                                                                  | 2.45 (0.72-8.29)                            |
| Q4, 7-14 points, (most)     | <b>1.50 (1.21-1.86)</b> | <b>1.51 (1.19-1.92)</b>                                                                                                     | <b>1.51 (1.17-1.95)</b>                                                                        | <b>1.58 (1.22-2.03)</b>                                                           | 2.46 (0.81-7.45)                            |
| <i>P</i> trend <sup>c</sup> | <b>&lt;.001</b>         | <b>&lt;.001</b>                                                                                                             | <b>&lt;.001</b>                                                                                | <b>&lt;.001</b>                                                                   | .06                                         |
| Loneliness                  |                         |                                                                                                                             |                                                                                                |                                                                                   |                                             |
| Hardly ever                 | 1.0 [Reference]         | 1.0 [Reference]                                                                                                             | 1.0 [Reference]                                                                                | 1.0 [Reference]                                                                   | 1.0 [Reference]                             |
| Less than some of the time  | 1.02 (0.84-1.23)        | 0.99 (0.80-1.23)                                                                                                            | 1.02 (0.82-1.27)                                                                               | 1.02 (0.81-1.28)                                                                  | 3.04 (0.85-10.93)                           |
| Some of the time or often   | <b>1.35 (1.11-1.65)</b> | <b>1.34 (1.07-1.67)</b>                                                                                                     | <b>1.31 (1.04-1.66)</b>                                                                        | <b>1.43 (1.13-1.81)</b>                                                           | 3.15 (0.79-12.52)                           |
| <i>P</i> trend <sup>c</sup> | <b>.003</b>             | <b>.01</b>                                                                                                                  | <b>.02</b>                                                                                     | <b>.003</b>                                                                       | .13                                         |

(continued)

|                             | Model 5: Main model, restricting cases to 1,023 participants with ongoing symptoms at final assessment | Model 6: Main model, including 1,584 presumed SARS-CoV-2 infections as cases | Model 7: Main model, excluding 132 participants hospitalized for COVID-19 | Model 8: Main model, multiply imputing missing long COVID status for 559 participants <sup>b</sup> | Model 9: Main model, excluding 69 cases onsetting within 4 weeks of baseline |
|-----------------------------|--------------------------------------------------------------------------------------------------------|------------------------------------------------------------------------------|---------------------------------------------------------------------------|----------------------------------------------------------------------------------------------------|------------------------------------------------------------------------------|
| Probable depression (PHQ-2) |                                                                                                        |                                                                              |                                                                           |                                                                                                    |                                                                              |
| No                          | 1.0 [Reference]                                                                                        | 1.0 [Reference]                                                              | 1.0 [Reference]                                                           | 1.0 [Reference]                                                                                    | 1.0 [Reference]                                                              |
| Subclinical symptoms        | <b>1.32 (1.15-1.51)</b>                                                                                | <b>1.20 (1.09-1.33)</b>                                                      | <b>1.25 (1.11-1.41)</b>                                                   | <b>1.25 (1.12-1.39)</b>                                                                            | <b>1.24 (1.11-1.40)</b>                                                      |
| Yes                         | <b>1.60 (1.34-1.91)</b>                                                                                | <b>1.40 (1.23-1.60)</b>                                                      | <b>1.41 (1.20-1.67)</b>                                                   | <b>1.36 (1.17-1.58)</b>                                                                            | <b>1.39 (1.19-1.63)</b>                                                      |
| <i>P</i> trend <sup>c</sup> | <b>&lt;.001</b>                                                                                        | <b>&lt;.001</b>                                                              | <b>&lt;.001</b>                                                           | <b>&lt;.001</b>                                                                                    | <b>&lt;.001</b>                                                              |
| Probable anxiety (GAD-2)    |                                                                                                        |                                                                              |                                                                           |                                                                                                    |                                                                              |
| No                          | 1.0 [Reference]                                                                                        | 1.0 [Reference]                                                              | 1.0 [Reference]                                                           | 1.0 [Reference]                                                                                    | 1.0 [Reference]                                                              |
| Subclinical symptoms        | <b>1.29 (1.11-1.49)</b>                                                                                | <b>1.21 (1.09-1.35)</b>                                                      | <b>1.29 (1.13-1.46)</b>                                                   | <b>1.28 (1.13-1.44)</b>                                                                            | <b>1.29 (1.13-1.46)</b>                                                      |
| Yes                         | <b>1.57 (1.33-1.86)</b>                                                                                | <b>1.42 (1.25-1.60)</b>                                                      | <b>1.50 (1.29-1.75)</b>                                                   | <b>1.46 (1.27-1.68)</b>                                                                            | <b>1.48 (1.28-1.72)</b>                                                      |
| <i>P</i> trend <sup>c</sup> | <b>&lt;.001</b>                                                                                        | <b>&lt;.001</b>                                                              | <b>&lt;.001</b>                                                           | <b>&lt;.001</b>                                                                                    | <b>&lt;.001</b>                                                              |
| Worry about COVID           |                                                                                                        |                                                                              |                                                                           |                                                                                                    |                                                                              |
| Not at all/not very worried | 1.0 [Reference]                                                                                        | 1.0 [Reference]                                                              | 1.0 [Reference]                                                           | 1.0 [Reference]                                                                                    | 1.0 [Reference]                                                              |
| Somewhat worried            | <b>1.23 (1.06-1.42)</b>                                                                                | <b>1.26 (1.13-1.40)</b>                                                      | <b>1.21 (1.07-1.38)</b>                                                   | <b>1.22 (1.08-1.38)</b>                                                                            | <b>1.21 (1.07-1.37)</b>                                                      |
| Very worried                | <b>1.53 (1.27-1.83)</b>                                                                                | <b>1.48 (1.30-1.70)</b>                                                      | <b>1.43 (1.21-1.69)</b>                                                   | <b>1.44 (1.24-1.67)</b>                                                                            | <b>1.43 (1.22-1.68)</b>                                                      |
| <i>P</i> trend <sup>c</sup> | <b>&lt;.001</b>                                                                                        | <b>&lt;.001</b>                                                              | <b>&lt;.001</b>                                                           | <b>&lt;.001</b>                                                                                    | <b>&lt;.001</b>                                                              |
| Perceived stress            |                                                                                                        |                                                                              |                                                                           |                                                                                                    |                                                                              |
| Q1, 0-2 points, (least)     | 1.0 [Reference]                                                                                        | 1.0 [Reference]                                                              | 1.0 [Reference]                                                           | 1.0 [Reference]                                                                                    | 1.0 [Reference]                                                              |
| Q2, 3-4 points              | 1.14 (0.88-1.46)                                                                                       | 1.12 (0.94-1.34)                                                             | 1.07 (0.86-1.34)                                                          | 1.08 (0.88-1.33)                                                                                   | 1.07 (0.87-1.32)                                                             |
| Q3, 5-6 points              | 1.26 (0.95-1.66)                                                                                       | <b>1.24 (1.03-1.49)</b>                                                      | 1.20 (0.95-1.53)                                                          | 1.22 (0.98-1.53)                                                                                   | 1.20 (0.96-1.51)                                                             |
| Q4, 7-14 points, (most)     | <b>1.82 (1.42-2.34)</b>                                                                                | <b>1.50 (1.26-1.79)</b>                                                      | <b>1.51 (1.21-1.90)</b>                                                   | <b>1.47 (1.20-1.82)</b>                                                                            | <b>1.50 (1.20-1.86)</b>                                                      |
| <i>P</i> trend <sup>c</sup> | <b>&lt;.001</b>                                                                                        | <b>&lt;.001</b>                                                              | <b>&lt;.001</b>                                                           | <b>&lt;.001</b>                                                                                    | <b>&lt;.001</b>                                                              |
| Loneliness                  |                                                                                                        |                                                                              |                                                                           |                                                                                                    |                                                                              |
| Hardly ever                 | 1.0 [Reference]                                                                                        | 1.0 [Reference]                                                              | 1.0 [Reference]                                                           | 1.0 [Reference]                                                                                    | 1.0 [Reference]                                                              |
| Less than some of the time  | 0.99 (0.79-1.25)                                                                                       | 0.98 (0.84-1.15)                                                             | 0.99 (0.81-1.21)                                                          | 1.03 (0.86-1.25)                                                                                   | 1.02 (0.84-1.24)                                                             |
| Some of the time or often   | <b>1.40 (1.11-1.77)</b>                                                                                | <b>1.29 (1.09-1.51)</b>                                                      | <b>1.33 (1.08-1.64)</b>                                                   | <b>1.34 (1.11-1.63)</b>                                                                            | <b>1.35 (1.10-1.65)</b>                                                      |
| <i>P</i> trend <sup>c</sup> | <b>.005</b>                                                                                            | <b>.002</b>                                                                  | <b>.007</b>                                                               | <b>.002</b>                                                                                        | <b>.003</b>                                                                  |

Note. PHQ-2 = 2-item Patient Health Questionnaire-2; GAD-2 = 2-item Generalized Anxiety Disorder; perceived stress and loneliness were queried in non-active health care workers only; Q=quartile.

Models adjusted for age, sex, racial identity, healthcare worker status, and partner's education

<sup>a</sup> Definition: Participants with at least one of smell/taste problems, shortness of breath or difficulty breathing, rash/blisters/welts, persistent cough, intermittent fever, muscle/chest pain, heart palpitations, mouth or tongue ulcers lasting  $\geq 4$  weeks; participants reporting only psychiatric, cognitive, or neurological COVID-19-related symptoms lasting  $\geq 4$  weeks were excluded (e.g., only fatigue, confusion/disorientation/'brain fog', memory issues, depression/anxiety/changes in mood, and/or headache).

<sup>b</sup> Multiple imputation was performed with fully conditional specification using 20 imputed datasets

<sup>c</sup> *P* trend analysis used indicator levels as a continuous variable.

**eTable 8. Association of types of distress and risk of subsequent long COVID lasting more than 8 weeks among persons with a positive SARS-CoV-2 test during follow-up, April 2020 - November 2021, N=3,142**

|                             | Long COVID cases/positive SARS-CoV-2 cases (No. %) | Model adjusted for age, sex, racial identity, healthcare worker status, and partner's education |
|-----------------------------|----------------------------------------------------|-------------------------------------------------------------------------------------------------|
| Probable depression (PHQ-2) |                                                    |                                                                                                 |
| No                          | 520/1574, 33.0                                     | 1.0 [Reference]                                                                                 |
| Subclinical symptoms        | 506/1174, 43.1                                     | <b>1.30 (1.15-1.47)</b>                                                                         |
| Yes                         | 190/387, 49.1                                      | <b>1.48 (1.25-1.75)</b>                                                                         |
| <i>P</i> trend <sup>a</sup> |                                                    | <b>&lt;.001</b>                                                                                 |
| Probable anxiety (GAD-2)    |                                                    |                                                                                                 |
| No                          | 373/1211, 30.8                                     | 1.0 [Reference]                                                                                 |
| Subclinical symptoms        | 535/1286, 41.6                                     | <b>1.35 (1.18-1.55)</b>                                                                         |
| Yes                         | 311/642, 48.4                                      | <b>1.58 (1.36-1.85)</b>                                                                         |
| <i>P</i> trend <sup>a</sup> |                                                    | <b>&lt;.001</b>                                                                                 |
| Worry about COVID           |                                                    |                                                                                                 |
| Not at all/not very worried | 307/984, 31.2                                      | 1.0 [Reference]                                                                                 |
| Somewhat worried            | 673/1671, 40.3                                     | <b>1.26 (1.10-1.45)</b>                                                                         |
| Very worried                | 239/485, 49.3                                      | <b>1.56 (1.32-1.85)</b>                                                                         |
| <i>P</i> trend <sup>a</sup> |                                                    | <b>&lt;.001</b>                                                                                 |
| Perceived stress            |                                                    |                                                                                                 |
| Q1, 0-2 points, (least)     | 150/506, 29.6                                      | 1.0 [Reference]                                                                                 |
| Q2, 3-4 points              | 139/425, 32.7                                      | 1.12 (0.89-1.42)                                                                                |
| Q3, 5-6 points              | 116/309, 37.5                                      | <b>1.32 (1.03-1.68)</b>                                                                         |
| Q4, 7-14 points, (most)     | 164/346, 47.4                                      | <b>1.72 (1.36-2.18)</b>                                                                         |
| <i>P</i> trend <sup>a</sup> |                                                    | <b>&lt;.001</b>                                                                                 |
| Loneliness                  |                                                    |                                                                                                 |
| Hardly ever                 | 144/457, 31.5                                      | 1.0 [Reference]                                                                                 |
| Less than some of the time  | 223/680, 32.8                                      | 1.04 (0.84-1.28)                                                                                |
| Some of the time or often   | 201/443, 45.4                                      | <b>1.46 (1.18-1.81)</b>                                                                         |
| <i>P</i> trend <sup>a</sup> |                                                    | <b>.003</b>                                                                                     |

Note. PHQ-2 = 2-item Patient Health Questionnaire-2; GAD-2 = 2-item Generalized Anxiety Disorder. As perceived stress and loneliness were collected only in participants who were not active healthcare workers (N=1,628), risk ratios for number of types of distress were calculated only in these participants.

<sup>a</sup>*P* trend analysis used indicator levels as a continuous variable.
